# Supplementary material for: Both live and heat killed Lactiplantibacillus plantarum DPUL-F232 alleviate whey protein-induced food allergy by regulating cellular immunity and repairing the intestinal barrier
Source: Royal Society of Chemistry journal article supplement (doi:10.1039/d4fo00105b), 2024-01-01
Supplement: d4fo00105b1.pdf [file d4fo00105b1.pdf]

>

GGGGTGGGGGGCGGTGCCTATACATGGCAGTCGACGACTCTGGTATTGAT  
TGGTGCTTGCATCATGATTTACATTTGAGTGAGTGGCGAACTGGTGAGTAA  
CACGTGGGAAACCTGCCCAGAAGCGGGGGATAACACCTGGAAACAGATG  
CTAATACCGCATAACAACCTTGGACCGCATGGTCCGAGTTTGAAGATGGC  
TTCGGCTATCACTTTTGGATGGTCCC GCGCGTATTAGCTAGATGGTGGGG  
TAACGGCTCACCATGGCAATGATACGTAGCCGACCTGAGAGGGTAATCGG  
CCACATTGGGACTGAGACACGGCCAACTCCTACGGGAGGCAGCAGTA  
GGGAATCTTCCACAATGGACGAAAGTCTGATGGAGCAACGCCGCGTGAGT  
GAAGAAGGGTTTCGGCTCGTAAA ACTCTGTTGTTAAAGAAGAACATATCT  
GAGAGTAACTGTT CAGGTATTGACGGTATTTAACCAGAAAGCCACGGCTA  
ACTACGTGCCAGCAGCCGCGGTAATACGTAGGTGGCAAGCGTTGTCCGGA  
TTTATTGGGCGTAAAGCGAGCGCAGGCGGTTTTTTAAGTCTGATGTGAAA  
GCCTTCGGCTCAACCGAAGAAGTGCATCGGAAACTGGGAAACTTGAGTGC  
AGAAGAGGACAGTGGAACTCCATGTGTAGCGGTGAAATGCGTAGATATAT  
GGAAGAACACCAGTGGCGAAGGCGGCTGTCTGGTCTGTA ACTGACGCTGA  
GGCTCGAAAGTATGGGTAGCAAACAGGATTAGATACCCTGGTAGTCCATA  
CCGTAAACGATGAATGCTAAGTGTGGAGGGTTTCCGCCCTTCAGTGCTG  
CAGCTAACGCATTAAGCATTCCGCCTGGGGAGTACGGCCGCAAGGCTGAA  
ACTCAAAGGAATTGACGGGGGCCC GCACAAGCGGTGGAGCATGTGGTTTA  
ATTCGAAGCTACGCGAAGAACCTTACCAGGTCTTGACATACTATGCAAAT  
CTAAGAGATTAGACGTTCCCTTCGGGGACATGGATACAGGTGGTGCATGG  
TTGTCGTCAGCTCGTGTCGTGAGATGTTGGGTAAAGTCCCGCAACGAGCG  
CAACCCTTATTATCAGTTGCCAGCATTAAAGTTGGGCACTCTGGTGAGACTG  
CCGGTGACAAACCGGAGGAAGGTGGGGATGACGTCAAATCATCATGCCC  
CTTATGACCTGGGCTACACACGTGCTACAATGGATGGTACAACGAGTTGC  
GAACTCGCGAGAGTAAGCTAATCTCTTAAAGCCATTCTCAGTTCGGATTGT  
AGGCTGCAACTCGCCTACATGAAGTCGGAATCGCTAGTAATCGCGGATCA  
GCATGCCGCGGTGAATACGTTCCCGGGCCTTGTACACACCGCCCGTCACA  
CCATGAGAGTTTGTAACACCCAAAGTCGGTGGGGTAACCTTTTAGAACCA  
GCCGCCTAAAGGTGACCCCGA
